# Supplementary material for: The effect of rol genes on phytoecdysteroid biosynthesis in Ajuga bracteosa differs between transgenic plants and hairy roots
Source: Royal Society of Chemistry journal article supplement (doi:10.1039/c6ra00250a), 2016-01-01
Supplement: c6ra00250a1.pdf [file c6ra00250a1.pdf]

## Supporting information

**Supplementary Fig. 1** Chemical structure of phytoecdysteroids standards

**Supplementary Fig. 2** RP-HPLC Chromatographs representing elution pattern of phytoecdysteroids in different samples of *A. bracteosa*. **a** Elution of six standard phytoecdysteroids. **b** phytoecdysteroids profiling in pPCV002-ABC transgenic line 1 (ABC1). **c** phytoecdysteroids pattern of elution in transgenic hairy root line (A1)

**Supplementary Table 1** Media used for the optimization of hairy root induction, stabilization and steady growth in *A. bracteosa*

**Supplementary Table 2** Effect of medium on induction of hairy roots in *A. bracteosa*

**Supplementary Table 3** Effect of medium on proliferation of hairy roots in *A. bracteosa*

**Supplementary Table 4** Effect of medium on stable growth and maintainability of hairy roots in *A. bracteosa*

**Supplementary Table 5** Effect of explants' origin on hairy root induction and its attributes in *A. bracteosa*

**Supplementary Table 6** Attributes of genes screened by PCR and semi-quantitative RT-PCR analysis in transgenic *A. bracteosa*

**Supplementary Table 7** Analysis of Variance (ANOVA) of pPCV002-ABC transformed intact plants (**a**) and transgenic hairy root lines (**b**) using 2-Factor Complete Randomized Design

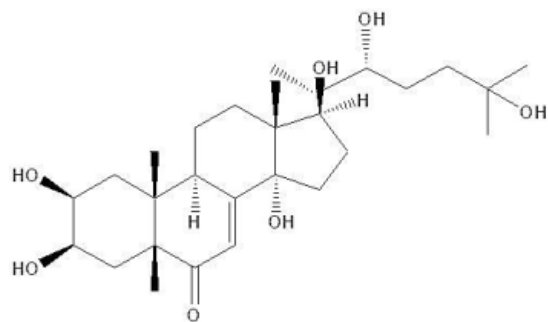

20-hydroxyecdysone

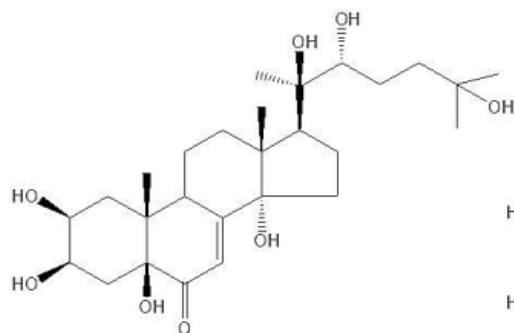

Polypodine B

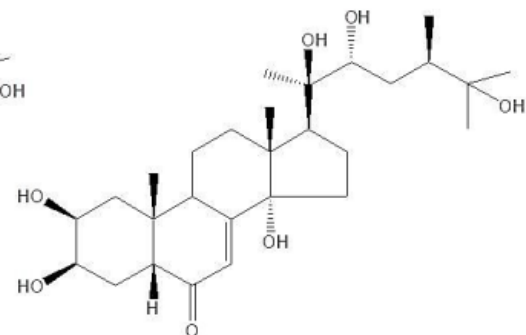

Makisterone A

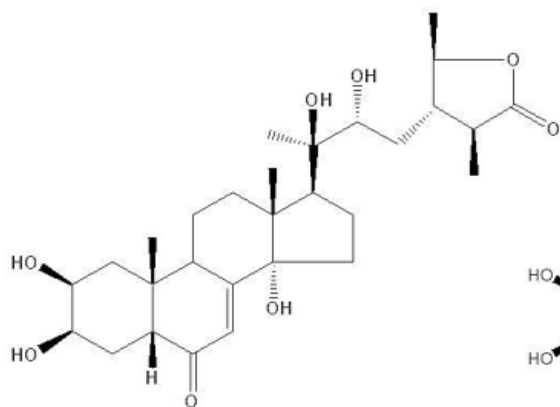

Cyasterone

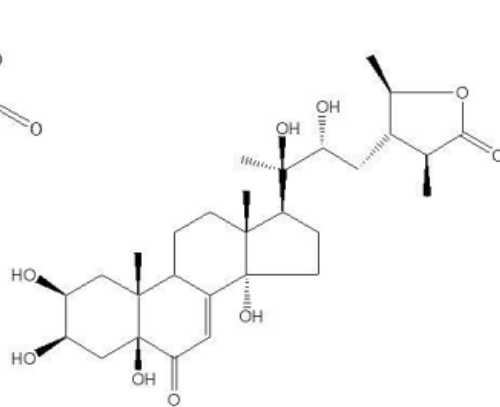

Sengosterone

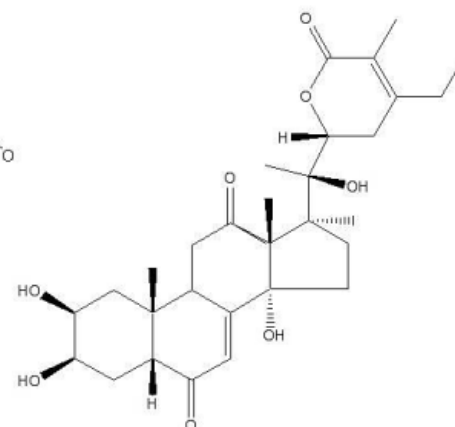

Ajugalactone

**Supplementary Fig.1 Chemical structure of phytoecdysteroids standards.**

**Supplementary Fig. 2 RP-HPLC Chromatographs representing elution pattern of phytoecdysteroids in different samples of *A. bracteosa*.** **a**, Elution of six standard phytoecdysteroids. **b**, phytoecdysteroids profiling in pPCV002-ABC transgenic line 1 (ABC1). **c**, phytoecdysteroids pattern of elution in transgenic hairy root line (A1).

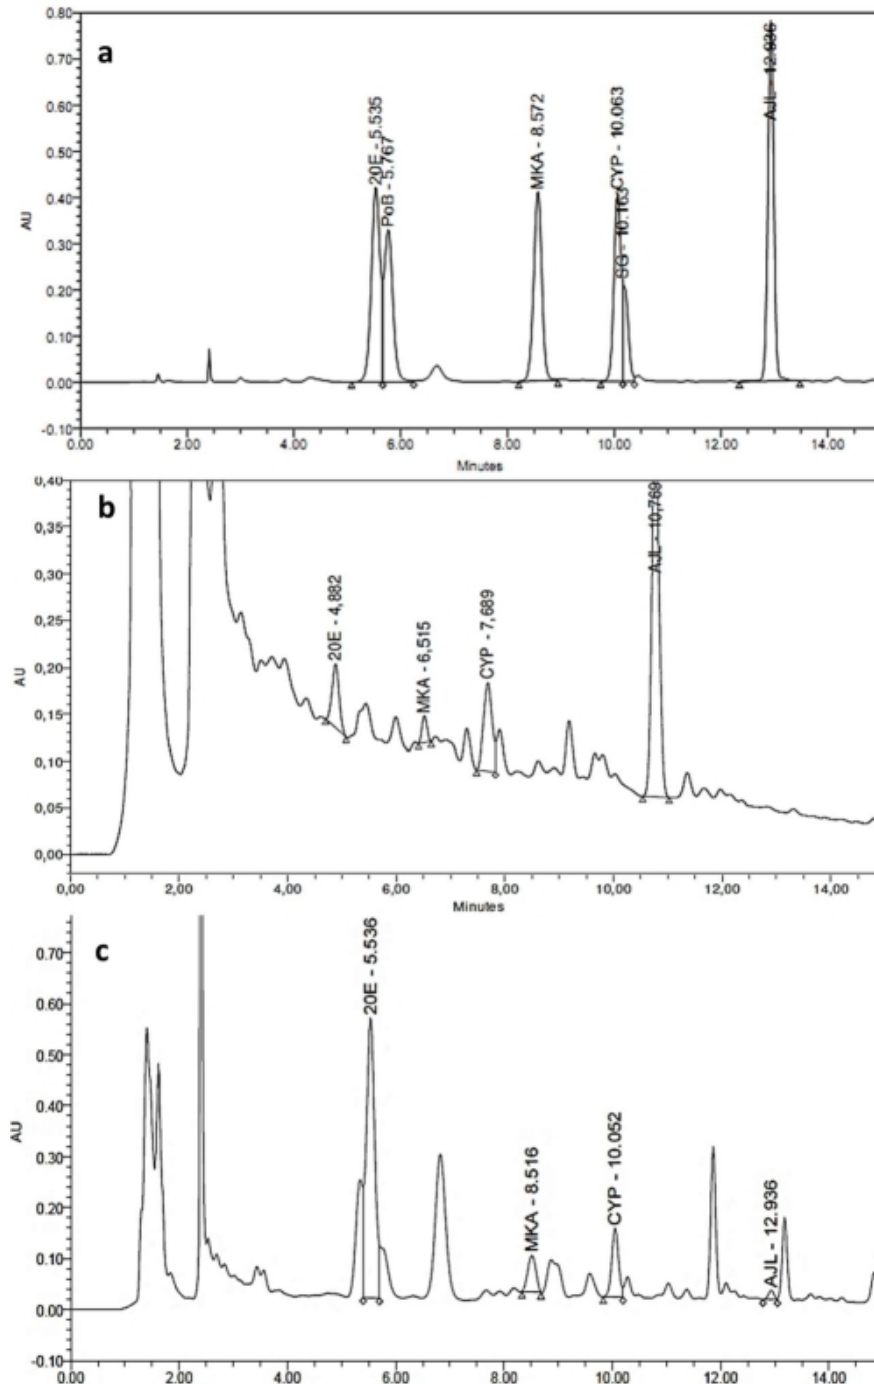

**Supplementary Table 1 Media used for the optimization of hairy root induction, stabilization and steady growth in *A. bracteosa*.**

| <b>Medium</b>                                                                     | <b>Composition</b>            |
|-----------------------------------------------------------------------------------|-------------------------------|
| <b>First phase media (hairy root induction <math>\geq</math> 10 days)</b>         | MS/B5+ Claforan 500 mg/L      |
|                                                                                   | SH+ Claforan 500 mg/L         |
| <b>Second phase media (hairy root proliferation <math>\geq</math> 30-35 days)</b> | 0.5MS+ Claforan 500 mg/L      |
|                                                                                   | 0.5MS+IBA+ Claforan 500 mg/L  |
|                                                                                   | 0.5 B5+ Claforan 500 mg/L     |
|                                                                                   | 0.5 B5+IBA+ Claforan 500 mg/L |
|                                                                                   | SH+ Claforan 500 mg/L         |
| <b>Third phase medium (stable growth and maintainability)</b>                     | MS+ Claforan 250 mg/L         |
|                                                                                   | 0.5MS+ Claforan 250 mg/L      |
|                                                                                   | B5+ Claforan 250 mg/L         |
|                                                                                   | 0.5 B5+ Claforan 250 mg/L     |
|                                                                                   | SH+ Claforan 250 mg/L         |

After one month of culturing of hairy roots in third phase medium, claforan was removed from it.

**Supplementary Table 2 Effect of medium on induction of hairy roots in *A. bracteosa*.**

| Media | Strain   | Explants | No. of roots | Explants producing |    | Root induction (days) | Branching (%) |
|-------|----------|----------|--------------|--------------------|----|-----------------------|---------------|
|       |          |          |              | roots              |    |                       |               |
| MS/B5 | LBA-9402 | 839      | 49           |                    | 34 | 13                    | 40            |
|       | A4       | 415      | 33           |                    | 23 | 12                    | 55            |
|       | Arqua1   | 262      | 12           |                    | 8  | 9                     | 60            |
| SH    | LBA-9402 | 60       | 289          |                    | 31 | 7                     | 90            |
|       | A4       | 20       | 78           |                    | 5  | 8                     | 100           |

**Supplementary Table 3 Effect of medium on proliferation of hairy roots in *A. bracteosa*.**

| Strain          | Media     | Growth status of roots                                                  |
|-----------------|-----------|-------------------------------------------------------------------------|
| <b>LBA-9402</b> | 0.5B5+IBA | Secondary branches, increase in length, few produce callus              |
|                 | 0.5B5     | Single root, no ramification, very slow growth                          |
|                 | 0.5MS     | Single root, no ramification, very slow growth                          |
|                 | 0.5MS+IBA | More increase in length than width, ramification, some produce callus   |
|                 | SH        | No ramification, callus induction                                       |
| <b>A4</b>       | 0.5B5+IBA | Ramification, length increase, some generate callus by increasing width |
|                 | 0.5B5     | No growth, no ramification                                              |
|                 | 0.5MS     | No growth, no ramification                                              |
|                 | 0.5MS+IBA | Ramification, increased in width and swollen, length also increased     |
|                 | SH        | Pale yellow, dying                                                      |
| <b>ARqua1</b>   | 0.5B5+IBA | Swollen callus, spiny                                                   |
|                 | 0.5B5     | No growth, no ramification, greyish                                     |
|                 | 0.5MS     | Dead                                                                    |
|                 | 0.5MS+IBA | Dying, no growth                                                        |
|                 | SH        | Surviving                                                               |

**Supplementary Table 4 Effect of medium on stable growth and maintainability of hairy roots in *A. bracteosa*.**

| <b>Media</b> | <b>Growth status of roots</b>                                               |
|--------------|-----------------------------------------------------------------------------|
| <b>B5</b>    | Bit swollen, broader, thick, ramification but less increase in length       |
| <b>MS</b>    | Callus like, beaded appearance, no increase in length but increase in width |
| <b>0.5B5</b> | Normal hairy roots, ramification, increase in length found, few are thick   |
| <b>0.5MS</b> | Multiple ramification, densely hairy, increase in length, few are thick     |
| <b>SH</b>    | No increase, pale yellow roots, dying                                       |

**Supplementary Table 5 Effect of explants' origin on hairy root induction and its attributes in *A. bracteosa*.**

|                 | Strain   | Explants | No. of roots | Explants producing roots | Root induction (days) | Branching |
|-----------------|----------|----------|--------------|--------------------------|-----------------------|-----------|
| <i>In vitro</i> | LBA-9402 | 634      | 22           | 15                       | 14                    | No        |
|                 | A4       | 245      | 12           | 15                       | 13                    | No        |
|                 | Arqua1   | 204      | 9            | 5                        | 8                     | No        |
| <i>Ex vitro</i> | LBA-9402 | 265      | 301          | 41                       | 11                    | Yes       |
|                 | A4       | 190      | 99           | 16                       | 12                    | Yes       |
|                 | Arqua1   | 58       | 3            | 3                        | 11                    | Yes       |



## Supplementary Table 6 Attributes of genes screened by PCR and semi-quantitative RT-PCR analysis in transgenic *A. bracteosa*.

| Vector                                              | Gene                                       | Sequence                                      | Size   | T <sub>m</sub> |
|-----------------------------------------------------|--------------------------------------------|-----------------------------------------------|--------|----------------|
| <i>pPCV002-ABC</i> (PCR)                            | <i>rolA</i>                                | <i>rolA1</i> :5'-AGAATGGAATTAGCCGGACTA-3'     | 308 bp | 53°C           |
|                                                     |                                            | <i>rolA2</i> :5'-GTATTAATCCCGTAGGTTTGT-3'     |        |                |
|                                                     | <i>rolB</i>                                | <i>rolB1</i> :5'-GCTCTTGCAGTGCTAGATTT-3'      | 779 bp | 55°C           |
|                                                     |                                            | <i>rolB2</i> :5'-GAAGGTGCAAGCTACCTCTC-3'      |        |                |
|                                                     | <i>rolC</i>                                | <i>rolC1</i> :5'-GAAGACGACCTGTGTTCTC-3'       | 540 bp | 54°C           |
|                                                     |                                            | <i>rolC2</i> :5'-CGTTCAAACGTTAGCCGA TT-3'     |        |                |
| <i>npt-II</i>                                       | <i>npt-II-1</i> :5'AAGATGGATTGCACGCAGGTC3' | 780 bp                                        | 54°C   |                |
|                                                     | <i>npt-II-2</i> :5'GAAGAACTCGTCAAGAAGGCG3' |                                               |        |                |
| <i>pRI A4, LBA-9402 and ARqua1</i> (PCR)            | <i>rolC</i>                                | <i>rolC1</i> :5'-TAACATGGCTGAAGACGACC-3'      | 534 bp | 60°C           |
|                                                     |                                            | <i>rolC2</i> :5'-AAACTTGCACTCGCCATGCC-3'      |        |                |
|                                                     | <i>virD1</i>                               | <i>virD1-1</i> :5'-ATGTCGCAAGGCAGTAAGCCC-3'   | 438 bp | 56°C           |
|                                                     |                                            | <i>virD1-2</i> :5'-GAAGTCTTTCAGCATGGAGCA-3'   |        |                |
| <i>pPCV002-ABC, pRI A4 and LBA-9402</i> (SQ-RT-PCR) | <i>rolC</i>                                | <i>rolC1</i> :5'-CTGTACCTCTACGTCGACT-3'       | 363 bp | 62°C           |
|                                                     |                                            | <i>rolC2</i> :5'-AAACTTGCACTCGCCATGCC-3'      |        |                |
|                                                     | <i>actin</i>                               | <i>actin1</i> :5'-ATCAGCAATACCAGGGAACATAGT-3' | 160 bp | 60°C           |
|                                                     |                                            | <i>actin2</i> :5'-AGGTGCCCTGAGGCTTGTTC-3'     |        |                |

PCR conditions were fixed except for annealing temperature. They were: 5 minutes 95°C, followed by 35 cycles of 35 seconds at 95°C, 35 sec for primers annealing (temperature given in table), and finally an extension of 10 min at 70°C.

**Supplementary Table 7 Analysis of Variance (ANOVA) of *pPCV002-ABC* transformed intact plants (a) and transgenic hairy root lines (b) using 2-Factor Complete Randomized Design.**

**(a)**

| <b>SOURCE</b>                         | <b>DF</b> | <b>SS</b>       | <b>MS</b>   | <b>F-value</b> | <b>P value</b> |
|---------------------------------------|-----------|-----------------|-------------|----------------|----------------|
| Transgenic plants                     | 7         | 28379204        | 4054171.944 | 2794.538       | ***            |
| Phytoecdysteroids                     | 3         | 2628070         | 876023.351  | 603.8423       | ***            |
| Transgenic plants × phytoecdysteroids | 21        | 7420919         | 353377.094  | 243.5826       | ***            |
| Error                                 | 64        | 92847.91        | 1450.749    |                |                |
| <b>TOTAL</b>                          | <b>95</b> | <b>38521041</b> |             |                |                |

Coefficient of Variation: 4.68%

**(b)**

| <b>SOURCE</b>                              | <b>DF</b>  | <b>SS</b>           | <b>MS</b>    | <b>F-value</b> | <b>P value</b> |
|--------------------------------------------|------------|---------------------|--------------|----------------|----------------|
| Transgenic hairy roots                     | 58         | 22012543.866        | 379526.618   | 590.6268       | ***            |
| Ecdysteroids                               | 3          | 39953845.301        | 13317948.434 | 20725.6527     | ***            |
| Transgenic hairy roots × phytoecdysteroids | 174        | 18722812.986        | 107602.373   | 167.4529       | ***            |
| Error                                      | 472        | 303299.093          | 642.583      |                |                |
| <b>TOTAL</b>                               | <b>707</b> | <b>80992501.246</b> |              |                |                |

Coefficient of Variation: 6.71%.

ANOVA of transgenic hairy root lines was done against 59 established root clones. Out of them, 11 elite lines are mentioned here for phytoecdysteroids profiling and among those eleven, 9 hairy root clones which were obtained from the infection of LBA-9402 were studied further for expression analysis. DF, degree of freedom; SS, sum of squares; MS, means square.
